# Supplementary material
Source: PubMed Central journal article supplement (PMC7434637)
Supplement: mmc2.pdf [file mmc2.pdf]

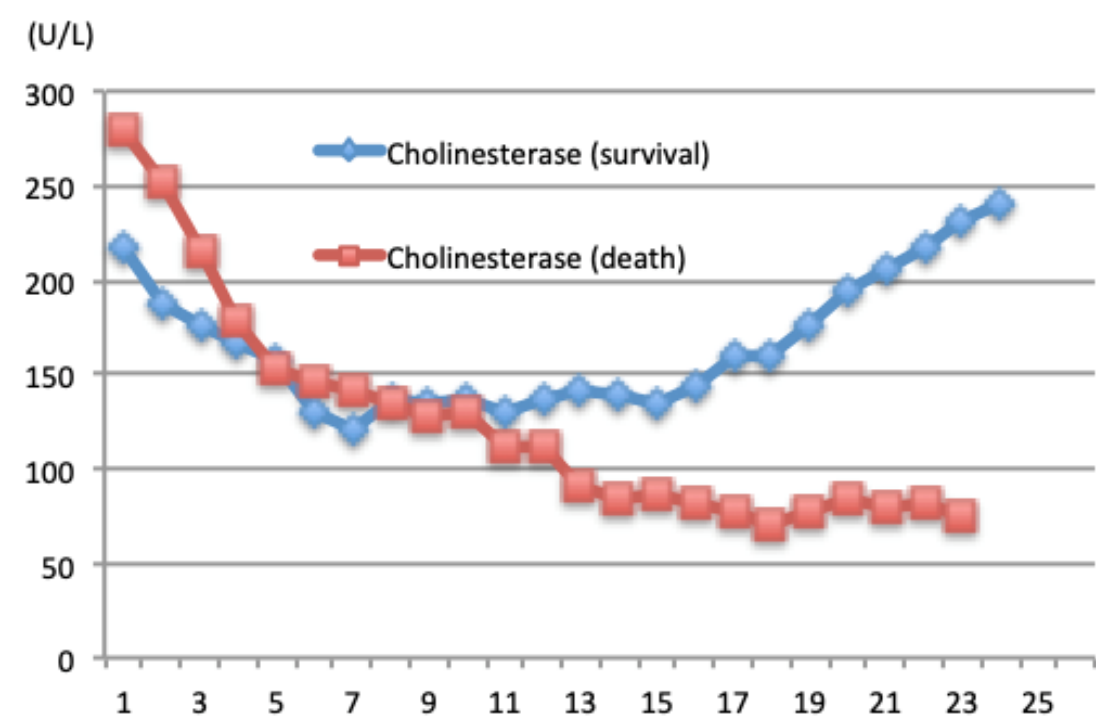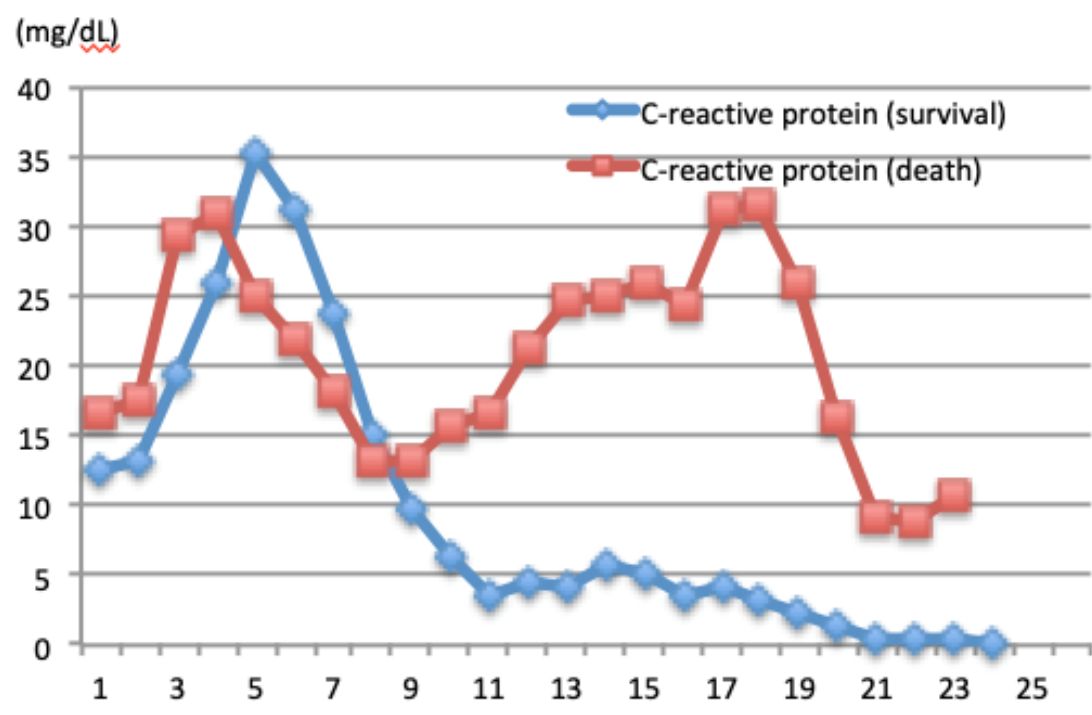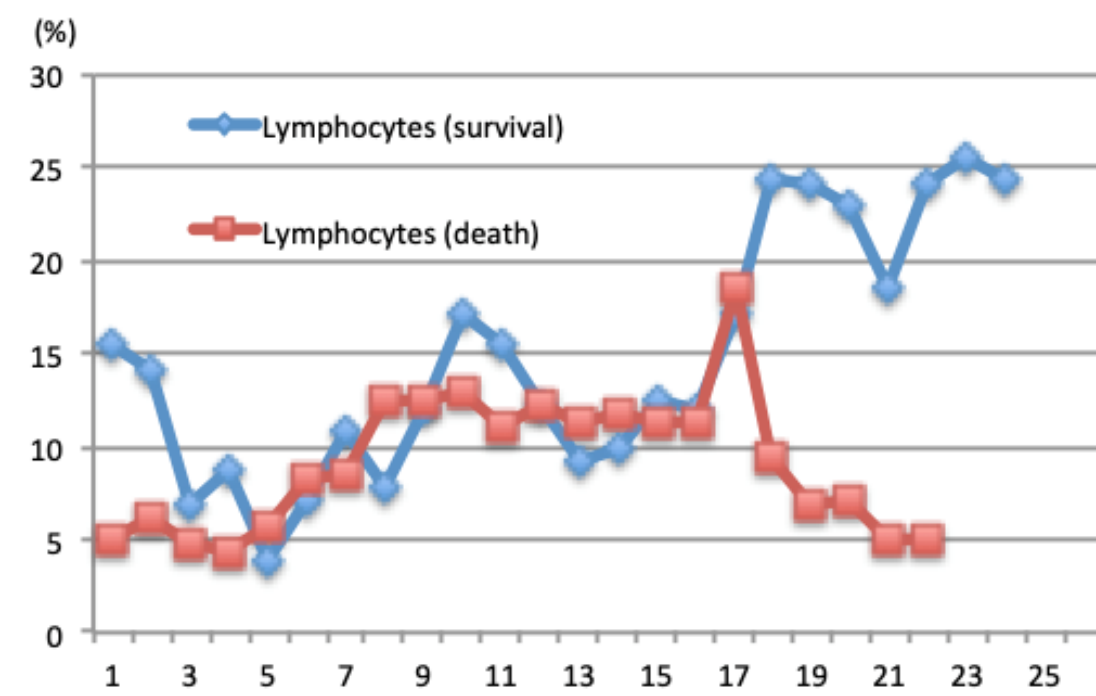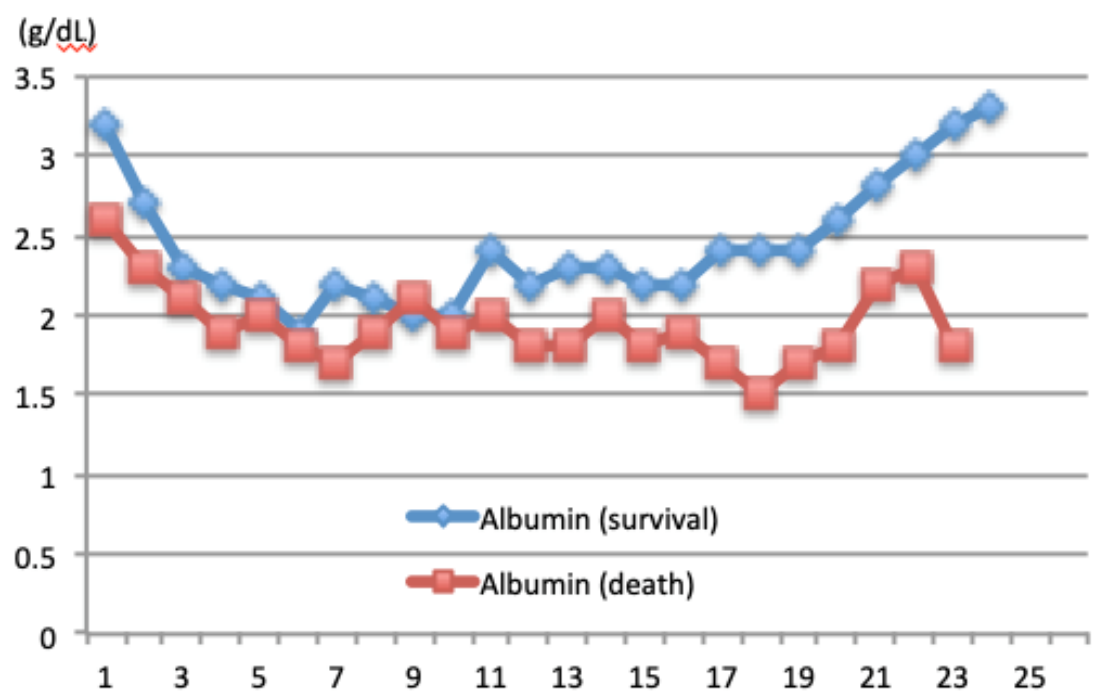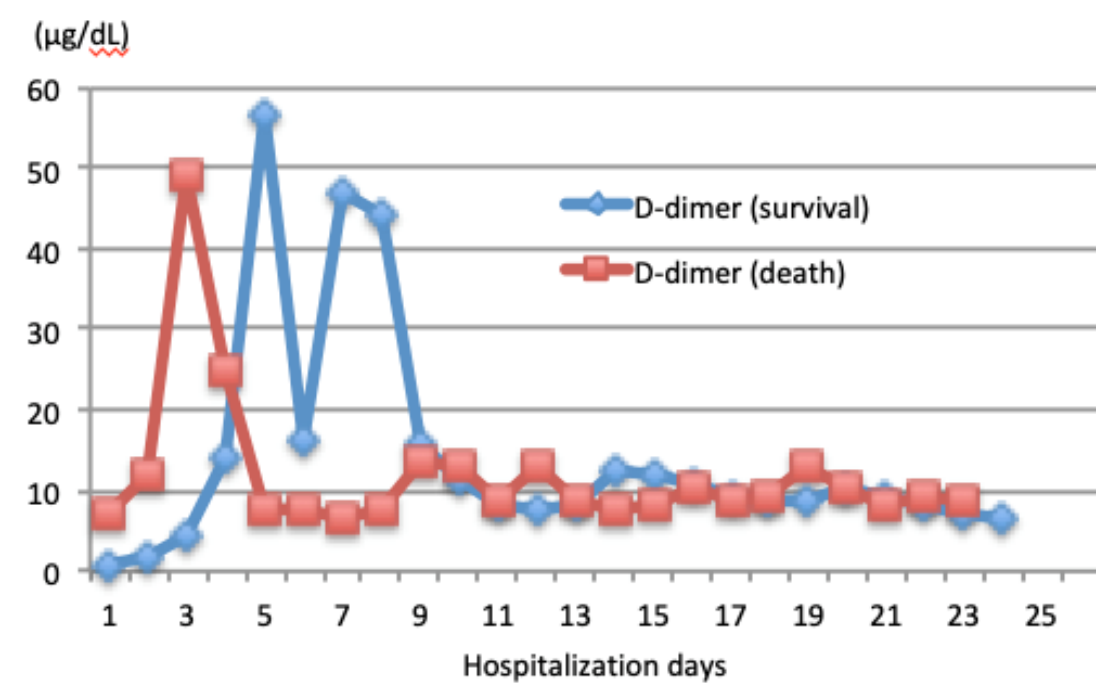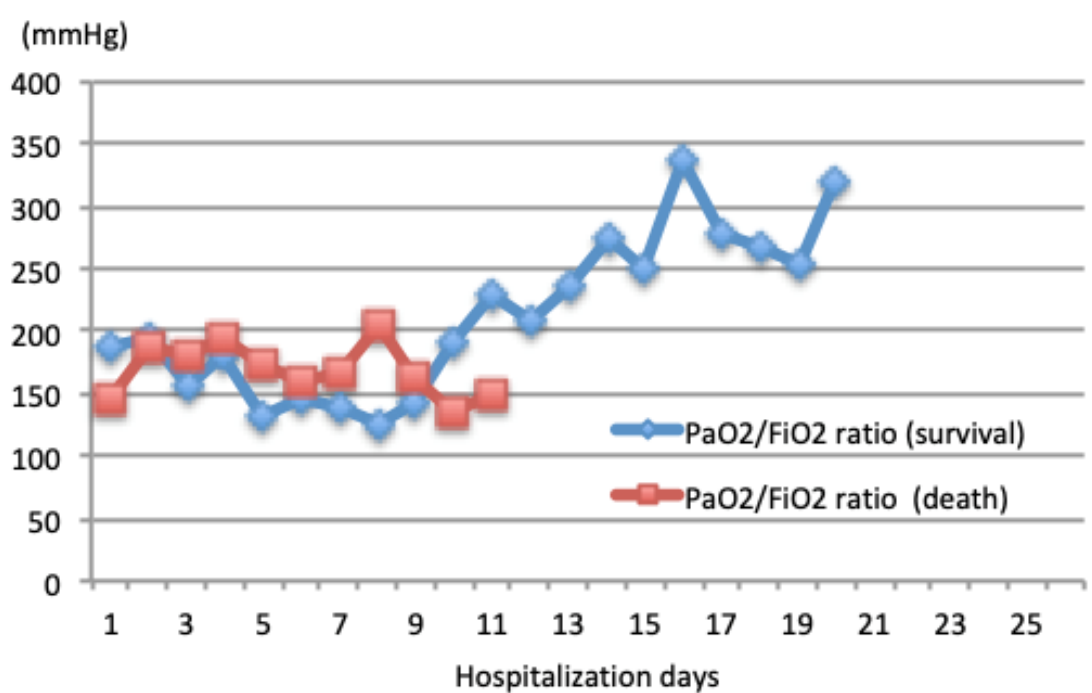

## Supplementary material 1:

Changes in cholinesterase and other factors over time in critically ill patients with good outcome and death
