# Supplementary material
Source: PubMed Central journal article supplement (PMC7434637)
Supplement: mmc3.pdf [file mmc3.pdf]

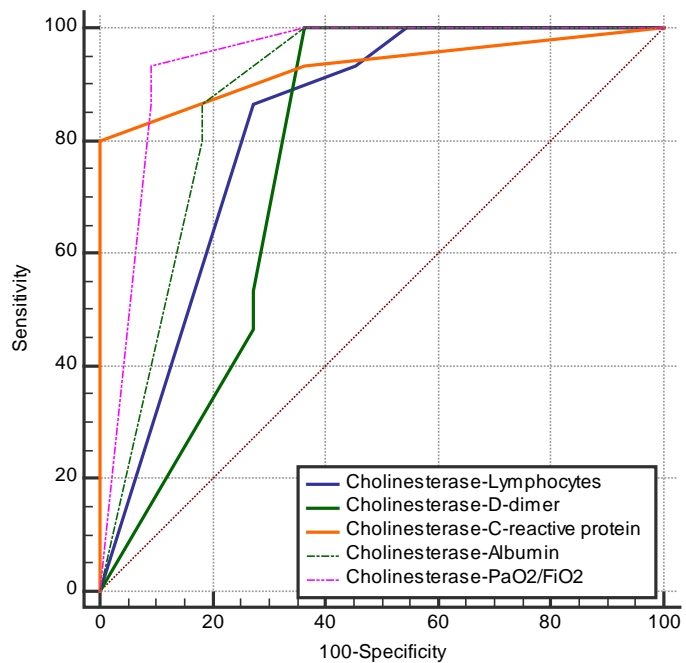

**A**

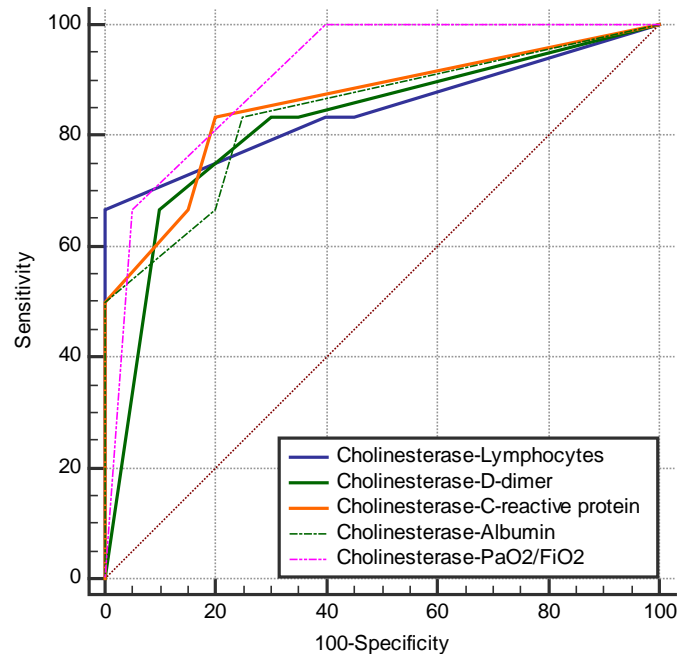

**B**

Supplementary material 3:

Prediction of severity (A) and mortality (B) based on the interaction of cholinesterase with other factors
